# Supplementary material for: Luteolin reduces fat storage inCaenorhabditis elegansby promoting the central serotonin pathway
Source: Royal Society of Chemistry journal article supplement (doi:10.1039/c9fo02095k), 2019-12-23
Supplement: c9fo02095k1.pdf [file c9fo02095k1.pdf]

## 1 Supplementary Figure S1

**A**

**Luteolin:  
Standard**

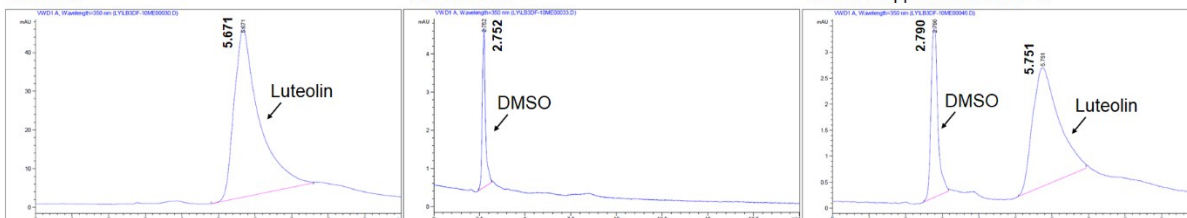

Luteolin supplementation at 60 °C

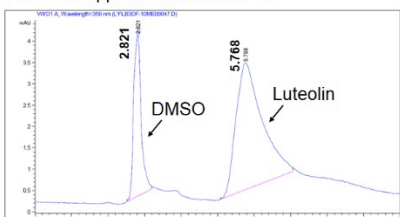

**B**

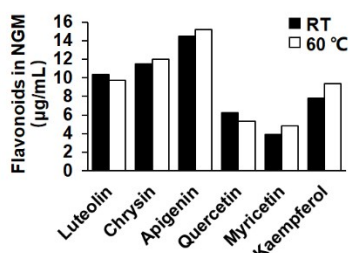

**C**

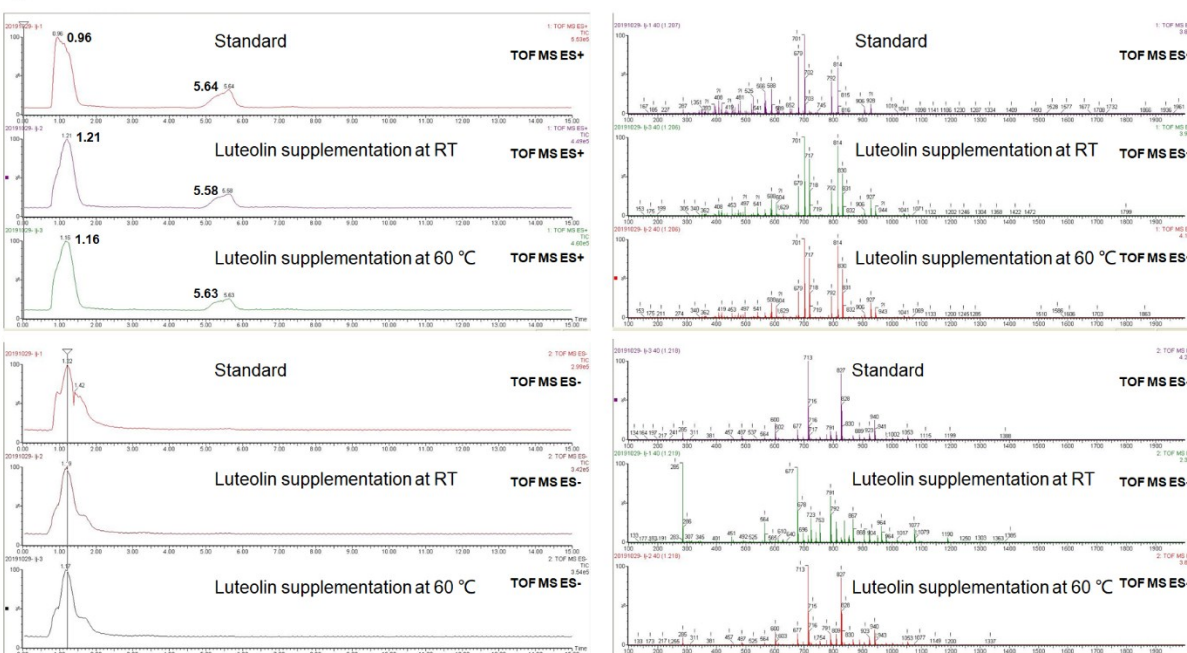

**2 Supplementary Figure S1. The concentration and structure of the flavonoids**

**3 under the treatment of room temperature (RT) and 60 °C.**

**4 (A) HPLC chromatogram of luteolin extracted from NGM plates under the treatment**

**5 of RT and 60 °C. (B) The concentration of the flavonoids extracted from NGM plates**

**6 under the treatment of RT and 60 °C. (C) UPLC-MS chromatogram of luteolin extracted**

7 from NGM plates under the treatment of RT and 60 °C.

## 8 Supplementary Figure S2

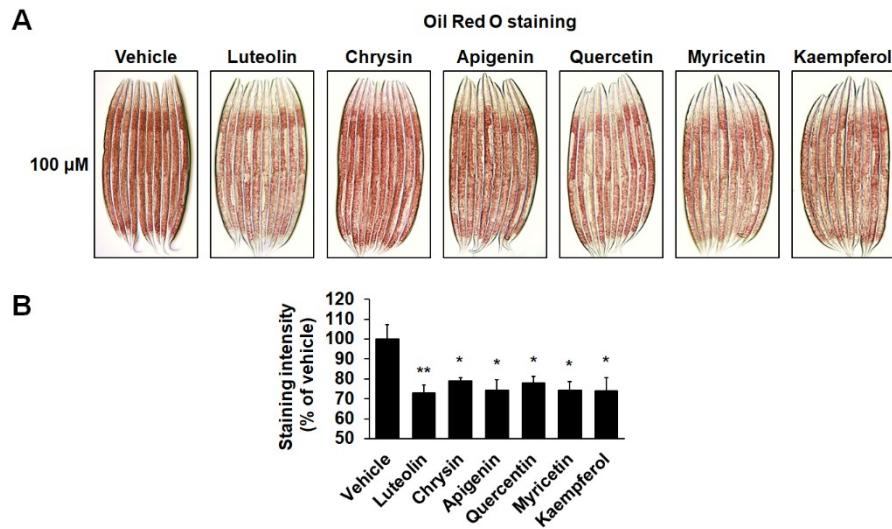

9 **Supplementary Figure S2. Diet-supplementation of flavonoids reduced the fat**  
10 **accumulation in *C. elegans* fed with dead OP50.**

11 (A and B) Representative images (A) and quantification of Oil Red O staining (B) in  
12 N2 fed with flavonoids fed with dead OP50. The data in (B) are presented as  
13 mean $\pm$ SEM. \* $p$ <0.05; \*\* $p$ <0.01 by one-way ANOVA.

14 **Supplementary Table S1. Primers for quantitative real-time PCR analysis in *C.***

15 *elegans*.

| <i>C. elegans</i> genes | Forward sequences (5' to 3') | Reverse sequences (5' to 3') |
|-------------------------|------------------------------|------------------------------|
| <i>gpd-2</i>            | GGAGTCTTCACCACCATCGA         | CGTGGTTGACTCCGACGACG         |
| <i>tph-1</i>            | TGACGCTGCCGATTCTCCAG         | GCATGTTGCAACTCGCCAGC         |
| <i>mod-1</i>            | GGATGTGTGGATGCTTGGATGC       | TTACGCTGTTCTGACAACGGGA       |
| <i>ser-1</i>            | TCACACGCGACGAGACTCGT         | CCATTGGTTCTGGCGACTGG         |
| <i>ser-4</i>            | CCACAGCGACTGCCTTCTAC         | TTACGGTACGTCGGTCGCGT         |
| <i>ser-6</i>            | CTGCTCCCTACTTCTGGCTGTC       | GACGGGAGAGATGTGGGTTGAC       |
| <i>atgl-1</i>           | CTGGCCTAGATCGACCGATG         | CGTATGCATGGAGCCAATCC         |
| <i>acs-2</i>            | GCAGCCTCGCTCTACTCT           | GACTCCTGCAAATGCACATGC        |
| <i>cpt-1</i>            | TATGAACCAGCATCAGCTCG         | GACGATCGACTCCTTGCCC          |
| <i>hacd</i>             | CAGGACTTATGGATACTCCAC        | GGCATGCGGAGTGCTCCG           |
| <i>fat-6</i>            | TCGGACTCTACCAGCTCATC         | TGAGCTCCGGCGGTTATTCC         |
| <i>fat-7</i>            | TTGGTGCATCAACAGCGCTG         | ACCAACGGCTACAACGTGG          |
| <i>sbp-1</i>            | GATTGCTCGCTGGAAGTGCG         | CCGAGTGCTAGTTCCATCCG         |
| <i>daf-19</i>           | GATCCGTCTCCACAACCTC          | TGAGGCTGTGGATGCTGCAT         |

16

17 **Supplementary Table S2. The effect of flavonoids supplementation on**  
 18 **developmental rate in N2 worms.**

| 19<br>20 | Flavonoids<br>supplementation | Proportion |                 |            |                 |                  |                 | The<br>wor<br>ms<br>wer<br>e<br>gro |
|----------|-------------------------------|------------|-----------------|------------|-----------------|------------------|-----------------|-------------------------------------|
|          |                               | L4 (%)     |                 | Adult (%)  |                 | Gravid adult (%) |                 |                                     |
|          |                               | mean ± SEM | <i>p. value</i> | mean ± SEM | <i>p. value</i> | mean ± SEM       | <i>p. value</i> |                                     |
| 21       | Vehicle                       | 6.67±1.92  |                 | 75.56±1.11 |                 | 17.78±2.94       |                 |                                     |
| 22       | Luteolin                      | 12.22±2.94 | 0.7182          | 73.3±1.92  | 0.9977          | 14.44±4.00       | 0.9585          |                                     |
| 23       | Chrysin                       | 12.22±4.00 | 0.7182          | 75.56±5.88 | 0.9999          | 12.22±5.56       | 0.7402          |                                     |
| 24       | Apigenin                      | 12.22±5.56 | 0.7182          | 77.78±5.88 | 0.9977          | 10±1.92          | 0.4503          |                                     |
|          | Quercetin                     | 11.11±2.94 | 0.8574          | 77.78±6.19 | 0.9977          | 11.11±4.00       | 0.5918          |                                     |
|          | Myricetin                     | 12.22±2.94 | 0.7182          | 80±1.92    | 0.9375          | 7.78±2.22        | 0.2337          |                                     |
|          | Kaempferol                    | 13.33±1.92 | 0.5651          | 75.56±2.94 | 0.9999          | 11.11±2.22       | 0.5918          |                                     |

25 wn on NGM plates with flavonoids since L1 stage of larvae. After 50 h, worms were  
 26 washed from the NGM plates and mounted on agarose pads and examined on a  
 27 compound microscope. The numbers of L4, adult and gravid adult worms were  
 28 distinguished by the development of the vulva. For each condition at least 30 worms  
 29 were scored and each analysis was repeated at least 3 times.
